# Supplementary material for: The Effectiveness of Community Action in Reducing Risky Alcohol Consumption and Harm: A Cluster Randomised Controlled Trial
Source: PLOS journal article supplement (doi:10.1371/journal.pmed.1001617), 2014-03-11
Supplement: S1 (10.1371/journal.pmed.1001617.s001) [file journal.pmed.1001617.s001]

**Table 1: CONSORT 2010 checklist of information to include when reporting a cluster randomised trial**

| Section/Topic                    | Item No | Standard Checklist item                                                                                                                | Extension for cluster designs                                                                 | Page No *                                                                                                                                                                                |
|----------------------------------|---------|----------------------------------------------------------------------------------------------------------------------------------------|-----------------------------------------------------------------------------------------------|------------------------------------------------------------------------------------------------------------------------------------------------------------------------------------------|
| <b>Title and abstract</b>        |         |                                                                                                                                        |                                                                                               |                                                                                                                                                                                          |
|                                  | 1a      | Identification as a randomised trial in the title                                                                                      | Identification as a cluster randomised trial in the title                                     | Title of the manuscript.                                                                                                                                                                 |
|                                  | 1b      | Structured summary of trial design, methods, results, and conclusions (for specific guidance see CONSORT for abstracts) <sup>1,2</sup> | See table 2                                                                                   | Abstract of the manuscript.                                                                                                                                                              |
| <b>Introduction</b>              |         |                                                                                                                                        |                                                                                               |                                                                                                                                                                                          |
| <b>Background and objectives</b> | 2a      | Scientific background and explanation of rationale                                                                                     | Rationale for using a cluster design                                                          | Paragraph 1 of the introduction.<br><br>Paragraph under sub-heading "Study design and community selection."                                                                              |
|                                  | 2b      | Specific objectives or hypotheses                                                                                                      | Whether objectives pertain to the the cluster level, the individual participant level or both | Paragraph 2 of the introduction.                                                                                                                                                         |
| <b>Methods</b>                   |         |                                                                                                                                        |                                                                                               |                                                                                                                                                                                          |
| <b>Trial design</b>              | 3a      | Description of trial design (such as parallel, factorial) including allocation ratio                                                   | Definition of cluster and description of how the design features apply to the clusters        | Paragraph under sub-heading "Study design and community selection."                                                                                                                      |
|                                  | 3b      | Important changes to methods after trial commencement (such as eligibility criteria), with reasons                                     |                                                                                               | Change in access to electoral roll data – paragraph under sub-heading "survey data."<br><br>Change to an unmatched analysis – 1st paragraph under the sub-heading "Statistical methods." |
| <b>Participants</b>              | 4a      | Eligibility criteria for participants                                                                                                  | Eligibility criteria for clusters                                                             | Eligibility for clusters (communities) – paragraph under sub-heading "Study design and community                                                                                         |

|                       |    |                                                                                                                                       |                                                                                                                                                                                                                    |                                                                                                                                                                                                                                                                                      |
|-----------------------|----|---------------------------------------------------------------------------------------------------------------------------------------|--------------------------------------------------------------------------------------------------------------------------------------------------------------------------------------------------------------------|--------------------------------------------------------------------------------------------------------------------------------------------------------------------------------------------------------------------------------------------------------------------------------------|
|                       |    |                                                                                                                                       |                                                                                                                                                                                                                    | selection.”                                                                                                                                                                                                                                                                          |
|                       |    |                                                                                                                                       |                                                                                                                                                                                                                    | Eligibility for participants in the survey data - paragraph under sub-heading “survey data.”                                                                                                                                                                                         |
|                       | 4b | Settings and locations where the data were collected                                                                                  |                                                                                                                                                                                                                    | <p>Description of the size of the clusters - paragraph under sub-heading “Study design and community selection.”</p> <p>Description of the characteristics of the clusters – Table 3.</p> <p>Descriptions of the data sources – first 3 paragraphs under sub-heading “Measures.”</p> |
| <b>Interventions</b>  | 5  | The interventions for each group with sufficient details to allow replication, including how and when they were actually administered | Whether interventions pertain to the cluster level, the individual participant level or both                                                                                                                       | Descriptions of the interventions, how they were selected and the order of their implementation – under the sub-heading “intervention descriptions” and Tables 1 and 2.                                                                                                              |
| <b>Outcomes</b>       | 6a | Completely defined pre-specified primary and secondary outcome measures, including how and when they were assessed                    | Whether outcome measures pertain to the cluster level, the individual participant level or both                                                                                                                    | Described under the sub-heading “Outcomes.”                                                                                                                                                                                                                                          |
|                       | 6b | Any changes to trial outcomes after the trial commenced, with reasons                                                                 |                                                                                                                                                                                                                    | N/A – no changes                                                                                                                                                                                                                                                                     |
| <b>Sample size</b>    | 7a | How sample size was determined                                                                                                        | Method of calculation, number of clusters(s) (and whether equal or unequal cluster sizes are assumed), cluster size, a coefficient of intracluster correlation (ICC or $k$ ), and an indication of its uncertainty | Described under the sub-heading “Sample sizes.”                                                                                                                                                                                                                                      |
|                       | 7b | When applicable, explanation of any interim analyses and stopping guidelines                                                          |                                                                                                                                                                                                                    | N/A                                                                                                                                                                                                                                                                                  |
| <b>Randomisation:</b> |    |                                                                                                                                       |                                                                                                                                                                                                                    |                                                                                                                                                                                                                                                                                      |

|                                         |     |                                                                                                                                                                                             |                                                                                                                                                                                            |                                                                                                                                                                                                                                                                                                            |
|-----------------------------------------|-----|---------------------------------------------------------------------------------------------------------------------------------------------------------------------------------------------|--------------------------------------------------------------------------------------------------------------------------------------------------------------------------------------------|------------------------------------------------------------------------------------------------------------------------------------------------------------------------------------------------------------------------------------------------------------------------------------------------------------|
| <b>Sequence generation</b>              | 8a  | Method used to generate the random allocation sequence                                                                                                                                      |                                                                                                                                                                                            | Described under the sub-heading “Randomisation.”                                                                                                                                                                                                                                                           |
|                                         | 8b  | Type of randomisation; details of any restriction (such as blocking and block size)                                                                                                         | Details of stratification or matching if used                                                                                                                                              | Described under the sub-heading “Randomisation.”                                                                                                                                                                                                                                                           |
| <b>Allocation concealment mechanism</b> | 9   | Mechanism used to implement the random allocation sequence (such as sequentially numbered containers), describing any steps taken to conceal the sequence until interventions were assigned | Specification that allocation was based on clusters rather than individuals and whether allocation concealment (if any) was at the cluster level, the individual participant level or both | Described under the sub-heading “Randomisation.”                                                                                                                                                                                                                                                           |
| <b>Implementation</b>                   | 10  | Who generated the random allocation sequence, who enrolled participants, and who assigned participants to interventions                                                                     | Replace by 10a, 10b and 10c                                                                                                                                                                | N/A for a cluster trial                                                                                                                                                                                                                                                                                    |
|                                         | 10a |                                                                                                                                                                                             | Who generated the random allocation sequence, who enrolled clusters, and who assigned clusters to interventions                                                                            | Described under the sub-heading “Randomisation.”                                                                                                                                                                                                                                                           |
|                                         | 10b |                                                                                                                                                                                             | Mechanism by which individual participants were included in clusters for the purposes of the trial (such as complete enumeration, random sampling)                                         | Complete enumeration applies to the interventions and routinely collected outcome data (described under sub-headings “Intervention selection, implementation and costs” and “Routinely collected data.” Random sampling applies to the survey outcome data (described under the sub-heading “Survey data.” |
|                                         | 10c |                                                                                                                                                                                             | From whom consent was sought (representatives of the cluster, or individual cluster members, or both), and whether consent was sought before or after randomisation                        | Described under the sub-heading “Randomisation.”                                                                                                                                                                                                                                                           |

|                                                             |     |                                                                                                                                                |                                                                                                                                             |                                                                                                                                                                                                                                   |
|-------------------------------------------------------------|-----|------------------------------------------------------------------------------------------------------------------------------------------------|---------------------------------------------------------------------------------------------------------------------------------------------|-----------------------------------------------------------------------------------------------------------------------------------------------------------------------------------------------------------------------------------|
| <b>Blinding</b>                                             | 11a | If done, who was blinded after assignment to interventions (for example, participants, care providers, those assessing outcomes) and how       |                                                                                                                                             | Described under the sub-heading "Randomisation."                                                                                                                                                                                  |
|                                                             | 11b | If relevant, description of the similarity of interventions                                                                                    |                                                                                                                                             | N/A                                                                                                                                                                                                                               |
| <b>Statistical methods</b>                                  | 12a | Statistical methods used to compare groups for primary and secondary outcomes                                                                  | How clustering was taken into account                                                                                                       | Described in the 2 <sup>nd</sup> paragraph under the sub-heading "Statistical methods."                                                                                                                                           |
|                                                             | 12b | Methods for additional analyses, such as subgroup analyses and adjusted analyses                                                               |                                                                                                                                             | Described under the sub-heading "Statistical methods."                                                                                                                                                                            |
| <b>Results</b>                                              |     |                                                                                                                                                |                                                                                                                                             |                                                                                                                                                                                                                                   |
| <b>Participant flow (a diagram is strongly recommended)</b> | 13a | For each group, the numbers of participants who were randomly assigned, received intended treatment, and were analysed for the primary outcome | For each group, the numbers of clusters that were randomly assigned, received intended treatment, and were analysed for the primary outcome | A CONSORT flow diagram is attached as an uploaded document. All communities randomly assigned received all interventions and were included in all analyses.                                                                       |
|                                                             | 13b | For each group, losses and exclusions after randomisation, together with reasons                                                               | For each group, losses and exclusions for both clusters and individual cluster members                                                      | There were no losses at the community (cluster level). Response rates and respondent characteristics for the survey data are described in the paragraph under the sub-heading "Survey response rates and sample characteristics." |
| <b>Recruitment</b>                                          | 14a | Dates defining the periods of recruitment and follow-up                                                                                        |                                                                                                                                             | Described in Table 1.                                                                                                                                                                                                             |
|                                                             | 14b | Why the trial ended or was stopped                                                                                                             |                                                                                                                                             | N/A                                                                                                                                                                                                                               |
| <b>Baseline data</b>                                        | 15  | A table showing baseline demographic and clinical characteristics for each                                                                     | Baseline characteristics for the individual and cluster levels as applicable for each group                                                 | Tables 3 and 4.                                                                                                                                                                                                                   |

| group                          |     |                                                                                                                                                   |                                                                                                                                            |                                                                                                                                                                                                                                   |
|--------------------------------|-----|---------------------------------------------------------------------------------------------------------------------------------------------------|--------------------------------------------------------------------------------------------------------------------------------------------|-----------------------------------------------------------------------------------------------------------------------------------------------------------------------------------------------------------------------------------|
| <b>Numbers analysed</b>        | 16  | For each group, number of participants (denominator) included in each analysis and whether the analysis was by original assigned groups           | For each group, number of clusters included in each analysis                                                                               | At the cluster level, data from all 20 communities were analysed. At the individual level, the number of surveys analysed is described in the paragraph under the sub-heading "Survey response rates and sample characteristics." |
| <b>Outcomes and estimation</b> | 17a | For each primary and secondary outcome, results for each group, and the estimated effect size and its precision (such as 95% confidence interval) | Results at the individual or cluster level as applicable and a coefficient of intracluster correlation (ICC or k) for each primary outcome | Primary outcomes reported under sub-heading "Routinely collected data (primary outcomes)" and Table 5.<br><br>Secondary outcomes reported under sub-heading "Self-reported data (secondary outcomes)" and Table 6.                |
|                                | 17b | For binary outcomes, presentation of both absolute and relative effect sizes is recommended                                                       |                                                                                                                                            | See Table 6.                                                                                                                                                                                                                      |
| <b>Ancillary analyses</b>      | 18  | Results of any other analyses performed, including subgroup analyses and adjusted analyses, distinguishing pre-specified from exploratory         |                                                                                                                                            | Both adjusted and unadjusted analyses are presented in Tables 5 and 6. Descriptions of the unadjusted analysis are in the 2nd paragraph under the subheading "Statistical methods."                                               |
| <b>Harms</b>                   | 19  | All important harms or unintended effects in each group (for specific guidance see CONSORT for harms <sup>3</sup> )                               |                                                                                                                                            | N/A                                                                                                                                                                                                                               |
| <b>Discussion</b>              |     |                                                                                                                                                   |                                                                                                                                            |                                                                                                                                                                                                                                   |
| <b>Limitations</b>             | 20  | Trial limitations, addressing sources of potential bias, imprecision, and, if relevant, multiplicity of analyses                                  |                                                                                                                                            | A description of methodological issues and limitations is provided under the sub-heading "Methodological considerations and implications."                                                                                        |
| <b>Generalisability</b>        | 21  | Generalisability (external validity, applicability) of the trial findings                                                                         | Generalisability to clusters and/or individual participants (as relevant)                                                                  | Last sentence of the paragraph under sub-heading "Study design and community                                                                                                                                                      |

|                          |    |                                                                                                               |                                                                                                                                                                                                                                                                                                                                                                                        |
|--------------------------|----|---------------------------------------------------------------------------------------------------------------|----------------------------------------------------------------------------------------------------------------------------------------------------------------------------------------------------------------------------------------------------------------------------------------------------------------------------------------------------------------------------------------|
|                          |    |                                                                                                               | selection.”                                                                                                                                                                                                                                                                                                                                                                            |
| <b>Interpretation</b>    | 22 | Interpretation consistent with results, balancing benefits and harms, and considering other relevant evidence | Interpretation provided under the sub-heading “Conclusions.”                                                                                                                                                                                                                                                                                                                           |
| <b>Other information</b> |    |                                                                                                               |                                                                                                                                                                                                                                                                                                                                                                                        |
| <b>Registration</b>      | 23 | Registration number and name of trial registry                                                                | Provided under the sub-heading “Ethics and trial registration.”                                                                                                                                                                                                                                                                                                                        |
| <b>Protocol</b>          | 24 | Where the full trial protocol can be accessed, if available                                                   | References 10 and 11, and in the trial registry documentation.                                                                                                                                                                                                                                                                                                                         |
| <b>Funding</b>           | 25 | Sources of funding and other support (such as supply of drugs), role of funders                               | The project was funded by the Foundation for Alcohol Research and Education, an independent charitable organisation ( <a href="http://www.fare.org.au/about-us/">http://www.fare.org.au/about-us/</a> ). The Australian Government provides core funding to the National Drug and Alcohol Research Centre through the Substance Misuse Prevention and Service Improvement Grants Fund. |

\* Note: page numbers optional depending on journal requirements

- 1 Hopewell S, Clarke M, Moher D, Wager E, Middleton P, Altman DG, et al. CONSORT for reporting randomised trials in journal and conference abstracts. *Lancet* 2008, 371:281-283
- 2 Hopewell S, Clarke M, Moher D, Wager E, Middleton P, Altman DG at al (2008) CONSORT for reporting randomized controlled trials in journal and conference abstracts: explanation and elaboration. *PLoS Med* 5(1): e20
- 3 Ioannidis JP, Evans SJ, Gotzsche PC, O'Neill RT, Altman DG, Schulz K, Moher D. Better reporting of harms in randomized trials: an extension of the CONSORT statement. *Ann Intern Med* 2004; 141(10):781-788.
